# Supplementary material for: Mixed influence of COVID-19 on primary maternal and child health services in sub-Saharan Africa: a scoping review
Source: PubMed Central journal article supplement (PMC11228267; doi:10.3389/fpubh.2024.1399398), 2024-06-24
Supplement: Table_1.pdf [file Table_1.pdf]

**Supplementary Table 1:** Influence of the COVID-19 pandemic on utilization of primary maternal and child health services in sub-Saharan Africa

| Author, year, Country           | ANC visits                                                                                                                                                                                                                                                                                                                                                                                                                                                                                    | Facility delivery | Postpartum care | Childhood vaccination                                                                                                                                                                                                                                                                                                                                                                                                                                                                                                                                                                                           | Services for other childhood diseases |
|---------------------------------|-----------------------------------------------------------------------------------------------------------------------------------------------------------------------------------------------------------------------------------------------------------------------------------------------------------------------------------------------------------------------------------------------------------------------------------------------------------------------------------------------|-------------------|-----------------|-----------------------------------------------------------------------------------------------------------------------------------------------------------------------------------------------------------------------------------------------------------------------------------------------------------------------------------------------------------------------------------------------------------------------------------------------------------------------------------------------------------------------------------------------------------------------------------------------------------------|---------------------------------------|
| Mariama Baissa al., 2021, Niger | <p><b>Decline in antenatal care visits (for 10 health centers)</b> in quarter 2 2020 compared to quarter 2 2019.</p> <ul style="list-style-type: none"> <li>Varied from -131 to -2191 women from a health center to another (for 10 health centers) [p value not reported]</li> </ul> <p><b>Increase in antenatal care visits (for 7 health centers)</b> in quarter 2 2020 compared to quarter 2 2019.</p> <ul style="list-style-type: none"> <li>Up to 30% [p value not reported]</li> </ul> | [Not reported]    | [Not reported]  | <p><b>Decline in vaccination</b></p> <ul style="list-style-type: none"> <li>-49% (95% CI: -58% to -40%) of children vaccinated with pentavalent 1 over the first 6 months of 2020, compared to 2019 [p value not reported]</li> <li>-48% (95% CI: -57% to -39%) for pentavalent 2 over the first 6 months of 2020, compared to 2019 [p value not reported]</li> <li>-35% (95% CI: -44% to -26%) for measles vaccine over the first 6 months of 2020, compared to 2019</li> </ul> <p>-80% in health centers of Niamey districts 2 and 5 in quarter 2 2020 compared to quarter 2 2019. [p value not reported]</p> | [Not reported]                        |

|                              |                                                                                                                                                                                                                                                                                                                                                                                                                                                                                                                             |                                                                                                                                                                                                                                                                                                                                                                                                                     |                |                                                                                                                                                                                                                                                                                                                                                         |                                                                                                                                                                                                                                                                  |
|------------------------------|-----------------------------------------------------------------------------------------------------------------------------------------------------------------------------------------------------------------------------------------------------------------------------------------------------------------------------------------------------------------------------------------------------------------------------------------------------------------------------------------------------------------------------|---------------------------------------------------------------------------------------------------------------------------------------------------------------------------------------------------------------------------------------------------------------------------------------------------------------------------------------------------------------------------------------------------------------------|----------------|---------------------------------------------------------------------------------------------------------------------------------------------------------------------------------------------------------------------------------------------------------------------------------------------------------------------------------------------------------|------------------------------------------------------------------------------------------------------------------------------------------------------------------------------------------------------------------------------------------------------------------|
| Ayele et al., 2021, Ethiopia | <p><b>Decline in antenatal care visits</b> in April-June 2020 compared to December 2019 - February 2020</p> <ul style="list-style-type: none"> <li>• -1.1 visits (95% CI: -7.2 to 5.0; p=0.6841) on average per health center for ANC1</li> <li>• -4.6 visits (95% CI: -20.3 to 11.2; p= 0.5233) on average per health center for ANC4</li> </ul>                                                                                                                                                                           | <p><b>Increase in facility deliveries</b> in April-June 2020 compared to December 2019 - February 2020</p> <ul style="list-style-type: none"> <li>• 4 health center-based deliveries (95% CI: -1.5 to 9.5; p=0.1347) on average per health center</li> </ul>                                                                                                                                                        | [Not reported] | <p><b>Decline in vaccination</b> in April-June 2020 compared to December 2019 - February 2020</p> <ul style="list-style-type: none"> <li>• -4,9 children (95% CI: -3.8 to 13.6; p=0.2320) on average per health center for pentavalent 1</li> <li>• -1 child (95% IC: -9.6 to 7.6; p= 0.7498) on average per health center for pentavalent 4</li> </ul> | <p><b>Decline in pneumonia cases presenting at health centers</b> in April-June 2020 compared to December 2019 - February 2020</p> <ul style="list-style-type: none"> <li>• -22.6 cases (95% IC: -43.9 to 1.2; p=0.0407) on average per health center</li> </ul> |
| Kouyaté et al., 2021, Guinea | <p><b>Decline in antenatal care visits</b> in March 2020 as compared to the monthly mean number of the March 2019 – February 2020 period</p> <ul style="list-style-type: none"> <li>• -702 women (95% CI: -885 to -520; p = 0.001) attending ANC1 in associative health centers</li> <li>• -64 women (95% CI: -137 to 9; p = 0.082) attending ANC1 in public health centers</li> <li>• <math>\beta = -1.015</math> (95% CI: -1.146 à -883; p = 0.001) as immediate effect for ANC4 in associative health centers</li> </ul> | <p><b>Decline in facility deliveries for associative health centers</b> in March 2020 as compared to the monthly mean number of the March 2019 – February 2020 period</p> <ul style="list-style-type: none"> <li>• -596 women (95% CI: -677 to -516 ; p = 0.001) giving birth in health centers</li> </ul> <p><b>Increase in facility deliveries for public health centers</b> in March 2020 as compared to the</p> | [Not reported] | [Not reported]                                                                                                                                                                                                                                                                                                                                          | [Not reported]                                                                                                                                                                                                                                                   |

- $\beta = -794$  (95% CI: -909 to -678 ;  $p = 0.001$ ) as immediate effect for ANC4 in public health centers
- monthly mean number of the March 2019 – February 2020 period
- 36 women (95% CI: -56 à 133 ;  $p = 0.413$ ) giving birth in health centers

Henrique et al., 2021, Mozambique

**Decline in antenatal care visits (1st visits)** in March-May 2020 compared to March-May 2019:

- -4% [p value not reported]
- -12% [p value not reported] for ANC 1 occurring over the 1<sup>st</sup> trimester of pregnancy

**Increase in antenatal care visits (4th visits)** in March-May 2020 compared to March-May 2019:

- 125% [p value not reported]

[Not reported]

**Decline in postpartum visits** in March-May 2020 compared to March-May 2019

- -1% (from 2795 to 2761) [p value not reported]

**Decline in vaccination** in March-May 2020 compared to March-May 2019

- -2% [p value not reported] of children who received at least a vaccine dose in 25 September health center
- -20% ( $p=0.197$ ) of children who received at least a vaccine dose in Marrere health center
- -16% [p value not reported] of children who received complete vaccine doses in 25 September health center
- -18% ( $p=0.544$ ) of children who received complete vaccine doses in Marrere health center

[Not reported]
